# Supplementary material for: Direct methane fuel cell with La2Sn2O7–Ni–Gd0.1Ce0.9O1.95 anode and electrospun La0.6Sr0.4Co0.2Fe0.8O3−δ–Gd0.1Ce0.9O1.95 cathode
Source: Royal Society of Chemistry journal article supplement (doi:10.1039/c3ra41227j), 2013-01-01
Supplement: c3ra41227j.pdf [file c3ra41227j.pdf]

**Electronic Supplementary Information**

**Direct Methane Fuel Cell with  $\text{La}_2\text{Sn}_2\text{O}_7\text{-Ni-Gd}_{0.1}\text{Ce}_{0.9}\text{O}_{1.95}$  Anode and Electrospun  
 $\text{La}_{0.6}\text{Sr}_{0.4}\text{Co}_{0.2}\text{Fe}_{0.8}\text{O}_{3-\delta}\text{-Gd}_{0.1}\text{Ce}_{0.9}\text{O}_{1.95}$  Cathode**

Jin Goo Lee, <sup>a</sup> Chan Min Lee, <sup>a,b</sup> Myong Geun Park <sup>a</sup> and Yong Gun Shul\*<sup>a</sup>

<sup>a</sup> *Department of Chemical and Bio-molecular Engineering, Yonsei University, 134 Shinchon-dong, Seodaemun-gu, Seoul, 120-749, Republic of Korea*

<sup>b</sup> *Department of Molecular and Material Sciences, Kyushu University, 6-1 Kasugakoen, Kasuga, Fukuoka, 816-8580, Japan*

\*<sup>a</sup> *Corresponding author - tel: +82-02-2123-3554; fax: +82-02-393-6594; E-mail: [shulyg@yonsei.ac.kr](mailto:shulyg@yonsei.ac.kr)*

## Supplementary Figures

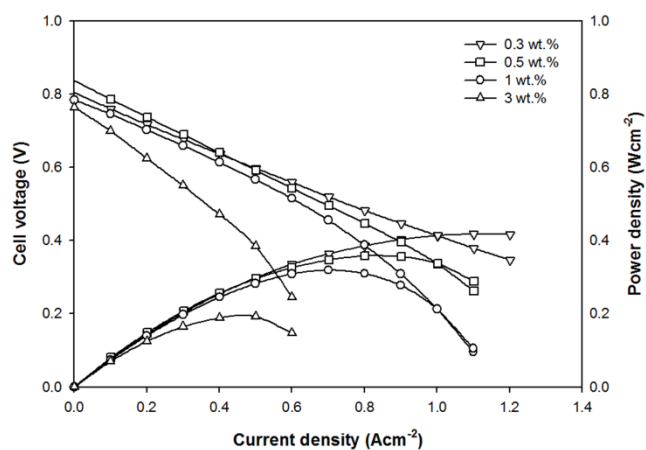

**Figure S1.** I-V curves of the La<sub>2</sub>Sn<sub>2</sub>O<sub>7</sub>-Ni-GDC/GDC/conventional LSCF-GDC cell depending on the weight ratio of La<sub>2</sub>Sn<sub>2</sub>O<sub>7</sub> to NiO at 650 °C (CH<sub>4</sub>: 25sccm and Air 300 sccm)

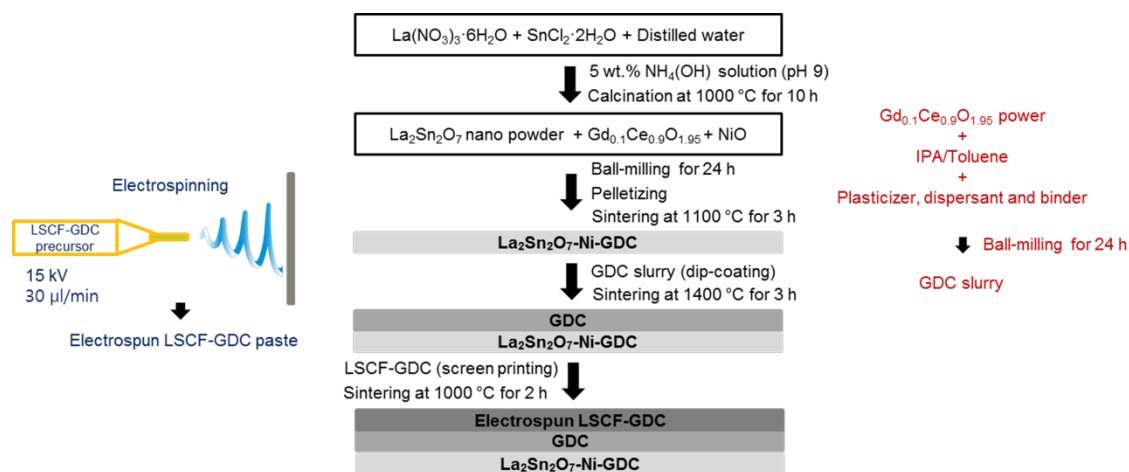

**Figure S2.** Synthesis and fabrication process of the  $\text{La}_2\text{Sn}_2\text{O}_7$  power and  $\text{La}_2\text{Sn}_2\text{O}_7$ -Ni-GDC/GDC/electrospun LSCF-GDC cell

**Table S1.** The elemental composition of the  $\text{La}_2\text{Sn}_2\text{O}_7$ ,  $\text{La}_{0.6}\text{Sr}_{0.4}\text{Co}_{0.2}\text{Fe}_{0.8}\text{O}_{3-\delta}$ , and  $\text{Gd}_{0.1}\text{Ce}_{0.9}\text{O}_{1.95}$  powders used in this study

| Atomic fraction of:                                                                                                 | La     | Sn     | Sr   | Co   | Fe   | Gd   | Ce   | O              |
|---------------------------------------------------------------------------------------------------------------------|--------|--------|------|------|------|------|------|----------------|
| $\text{La}_2\text{Sn}_2\text{O}_7$<br>(Sol-gel synthesis)                                                           | 0.1742 | 0.1739 |      |      |      |      |      | 0.6519         |
| $\text{La}_{0.6}\text{Sr}_{0.4}\text{Co}_{0.2}\text{Fe}_{0.8}\text{O}_{3-\delta}$<br>(Inframmat Advanced Materials) | 0.12   |        | 0.08 | 0.04 | 0.16 |      |      | 0.6 - $\delta$ |
| $\text{Gd}_{0.1}\text{Ce}_{0.9}\text{O}_{1.95}$<br>(Rhodia)                                                         |        |        |      |      |      | 0.03 | 0.31 | 0.66           |

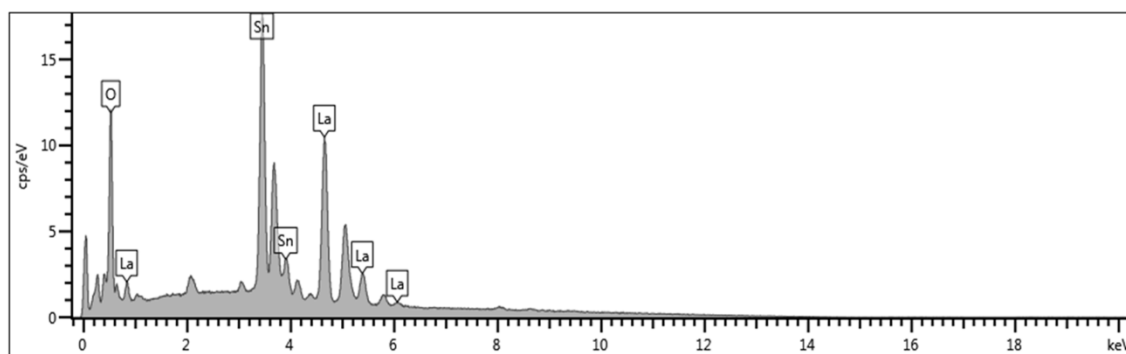

**Figure S3.** Energy-dispersive X-ray spectroscopy (EDX) data of the  $\text{La}_2\text{Sn}_2\text{O}_7$  power calcined at 1000 °C in air

**Table S2.** Impedance model for the La<sub>2</sub>Sn<sub>2</sub>O<sub>7</sub>-Ni-GDC anode-supported cell with the electrospun LSCF-GDC cathode and the Ni-GDC anode-supported cell with the conventional LSCF-GDC cathode <sup>[1]</sup>

| Summit frequency of: | (R <sub>Cathode, High</sub> Q <sub>1</sub> ) | (R <sub>Anode, TPB</sub> Q <sub>2</sub> )                                | (R <sub>Cathode, Low</sub> Q <sub>3</sub> )                                   | (R <sub>Anode, Diff</sub> Q <sub>4</sub> ) | (R <sub>Anode, Conv</sub> Q <sub>5</sub> ) |
|----------------------|----------------------------------------------|--------------------------------------------------------------------------|-------------------------------------------------------------------------------|--------------------------------------------|--------------------------------------------|
| 700 °C               | ~18 kHz                                      | ~1 kHz                                                                   | ~100 Hz                                                                       | ~50 Hz                                     | ~3 Hz                                      |
| Interpretation:      | Charge transfer at the cathode interface     | Charge transfer of the anode and diffusion of charged species at the TPB | Dissociative adsorption, transfer of species at the TPB and surface diffusion | Gas diffusion                              | Gas conversion                             |

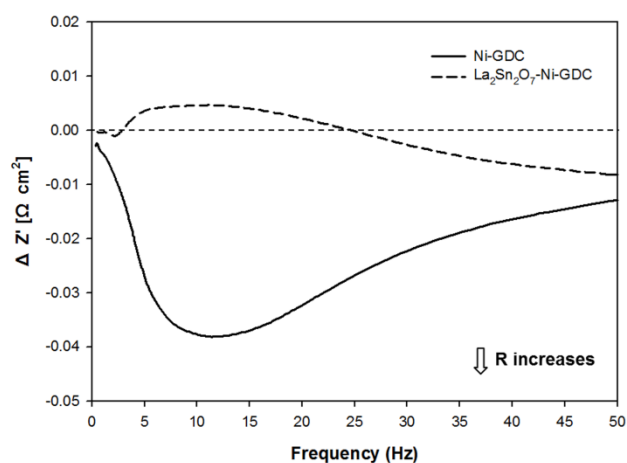

**Figure S4.** ADIS plots of the  $\text{La}_2\text{Sn}_2\text{O}_7$ -Ni-GDC anode-supported cell with the electrospun LSCF-GDC cathode and the Ni-GDC anode-supported cell with the conventional LSCF-GDC cathode at 650 °C when the fuel is changed from hydrogen to methane

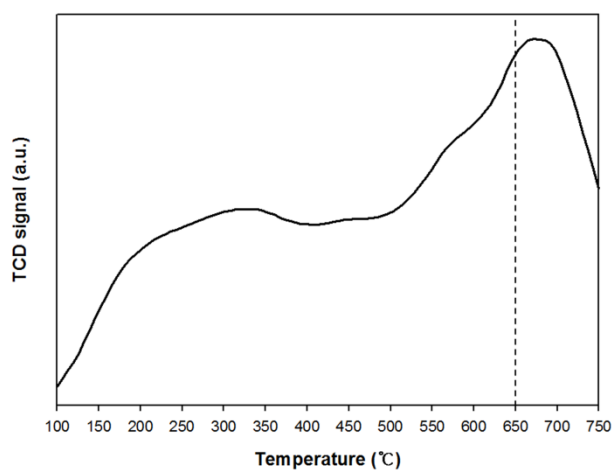

**Figure S5.** Temperature-programmed reduction (TPR) data of  $\text{La}_2\text{Sn}_2\text{O}_7$  in a flow rate of 50 sccm of mixed gas (methane: 10 % and helium: 90 %) and a temperature range from 100  $^{\circ}\text{C}$  to 750  $^{\circ}\text{C}$

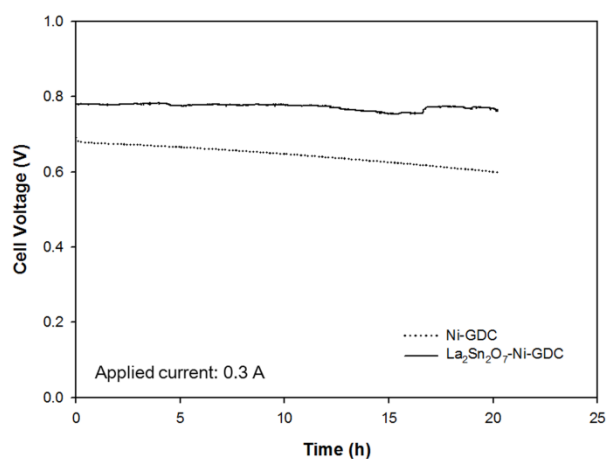

**Figure S6.** Voltage variation of the  $\text{La}_2\text{Sn}_2\text{O}_7\text{-Ni-GDC}$  anode-supported cell with the electrospun LSCF-GDC cathode and the Ni-GDC anode-supported cell with the conventional LSCF-GDC cathode at 650 °C in methane fuel (applied current: 0.3 A, methane and air flow rate: 25 sccm and 300 sccm, respectively)

## References

1. J. Nielsen and M. Mogensen, *Solid State Ionics*, 2011, *189*, 74-81
